# Supplementary material for: Alterations and test–retest reliability of functional connectivity network measures in cerebral small vessel disease
Source: PubMed Central journal article supplement (PMC7294060; doi:10.1002/hbm.24967), 2020-02-22
Supplement: HBM-41-2629-s001.pdf [file HBM-41-2629-s001.pdf]

Supporting Information Table S1: MRI acquisition parameters

| Sequence         | Feature                        | CADASIL<br>(VASCAMY) | Sporadic SVD<br>(RUN DMC – InTENse) |
|------------------|--------------------------------|----------------------|-------------------------------------|
| 3D-T1            | Scanner                        | Skyra, 3 Tesla       | Prisma, 3 Tesla                     |
|                  | Head coil                      | 64-channels          | 32-channels                         |
|                  | Type                           | MPRAGE               | MP2RAGE                             |
|                  | TR [ms]                        | 2500                 | 5500                                |
|                  | TE [ms]                        | 4.37                 | 3.84                                |
|                  | TI [ms]                        | 1100                 | 700/2500                            |
|                  | Flip angle [°]                 | 7                    | 7/4                                 |
| FLAIR            | Voxel size [mm]                | 1                    | 0.85                                |
|                  | TR [ms]                        | 5000                 | 5000                                |
|                  | TE [ms]                        | 398                  | 394                                 |
|                  | TI [ms]                        | 1800                 | 1800                                |
| FLASH            | Voxel size [mm]                | 1                    | 0.85                                |
|                  | TR [ms]                        | 35                   | 35                                  |
|                  | TE [ms]                        | 29.5                 | 29.5                                |
|                  | Flip angle [°]                 | 15                   | 15                                  |
|                  | Slice thickness [mm]           | 2                    | 2                                   |
| Multi-shell DWI  | In-plane resolution [mm]       | 0.9 x 0.9            | 0.8 x 0.8                           |
|                  | TR [ms]                        | 3800                 | 3220                                |
|                  | TE [ms]                        | 104.8                | 74                                  |
|                  | Flip angle [°]                 | 90                   | 90                                  |
|                  | Slice thickness [mm]           | 2                    | 1.7                                 |
|                  | In-plane resolution [mm]       | 2 x 2                | 1.7 x 1.7                           |
|                  | b-values [s/mm <sup>2</sup> ]  | 200/500/1000/3000    | 200/500/1000/3000                   |
|                  | Directions (per b-value)       | 3/6/30/60            | 3/6/30/60                           |
|                  | b=0 [n]                        | 10                   | 10                                  |
|                  | multi-band acceleration factor | 3                    | 3                                   |
| Multi-band EPI   | TR [ms]                        | 700                  | 700                                 |
|                  | TE [ms]                        | 39                   | 39                                  |
|                  | Flip angle [°]                 | 52                   | 52                                  |
|                  | Slice thickness [mm]           | 3                    | 2.4                                 |
|                  | In-plane resolution [mm]       | 3 x 3                | 2.4 x 2.4                           |
|                  | multi-band acceleration factor | 8                    | 8                                   |
|                  | volumes                        | 675                  | 700                                 |
| se-EPI field map | TR [ms]                        | 7100                 | 7100                                |
|                  | TE [ms]                        | 66                   | 66                                  |
|                  | Flip angle [°]                 | 90                   | 90                                  |
|                  | Slice thickness [mm]           | 3                    | 2.4                                 |
|                  | In-plane resolution [mm]       | 3 x 3                | 2.4 x 2.4                           |

Abbreviations: DWI, diffusion-weighted imaging; EPI, echo planar imaging; FLAIR, fluid-attenuated inversion recovery; FLASH, fast low angle shot; MP(2)RAGE, magnetization prepared (2) rapid acquisition gradient echo(es); TE, echo time; TI, inversion time; TR, repetition time.

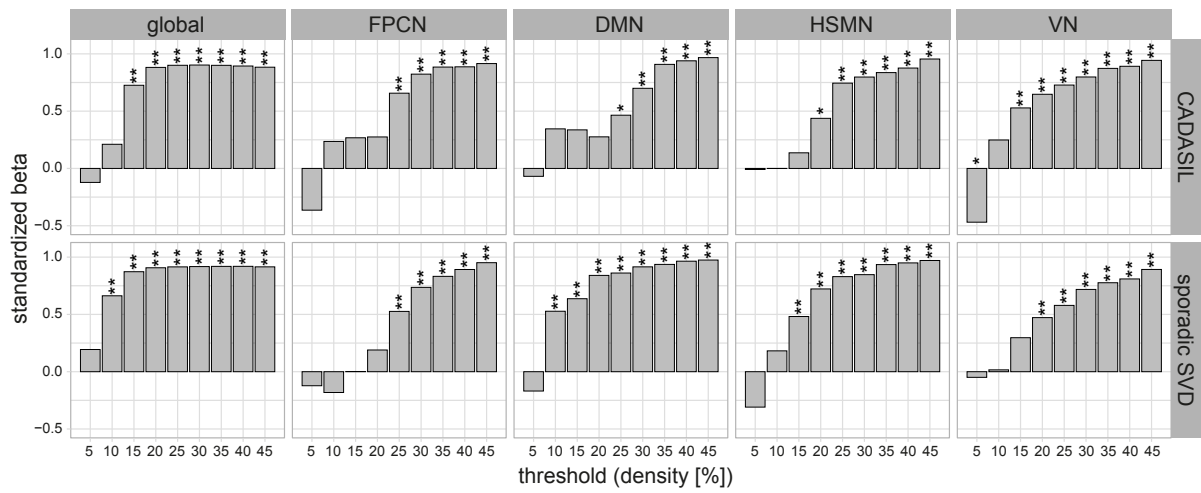

**Supporting Information Figure S1** Correlations between global efficiency and clustering coefficient (\* uncorrected-p < 0.01; \*\* uncorrected-p < 0.001)

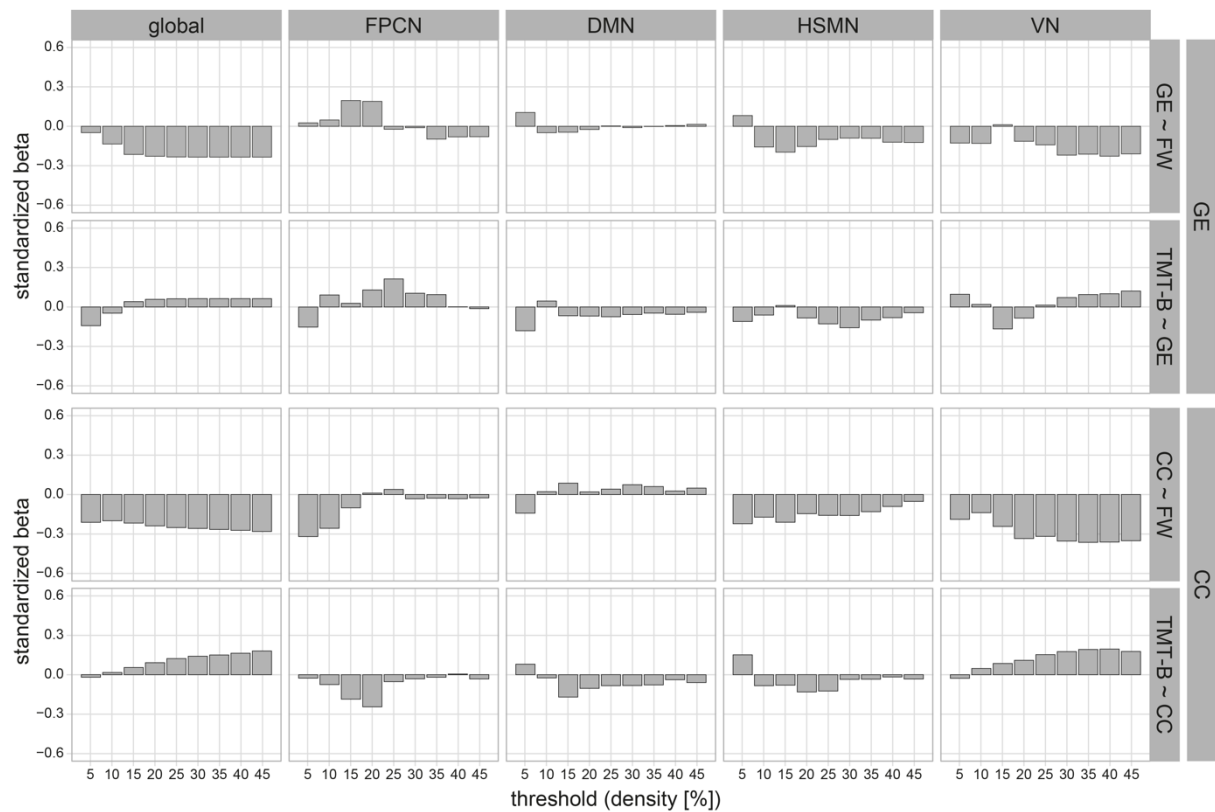

**Supporting Information Figure S2** Cross-sectional analysis in sporadic SVD using simple regression. Standardized beta estimates are shown for regression of network measures against disease burden ( $GE \sim FW$ ;  $CC \sim FW$ ) and processing speed against network measures ( $TMT-B \sim GE$ ;  $TMT-B \sim CC$ ). Analyses were performed for each of the five reconstructed networks (columns) using different density thresholds (x-axis). Abbreviations: GE, weighted global efficiency; CC, weighted clustering coefficient; FW, free water content within main white matter tracts; TMT-B, trail making test matrix B; global, global network; FPCN, fronto-parietal task control network; DMN, default mode network; HSMN, hand somatosensory-motor network; VN, visual network.

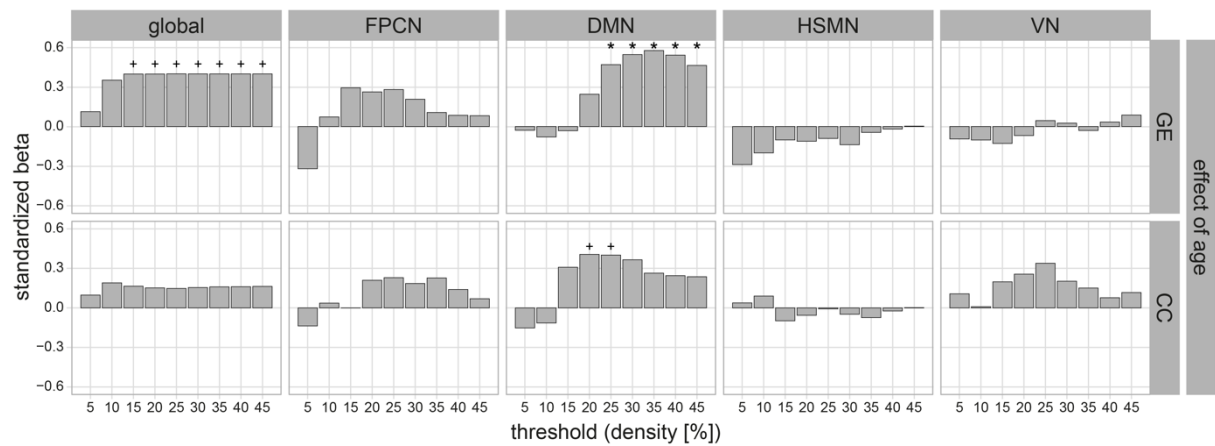

**Supporting Information Figure S3** Standardized beta estimates for simple regression analyses of subject-wise calculated standard deviations of the network measures (GE, weighted global efficiency; CC, weighted clustering coefficient) against age. Analyses were done for each of the five reconstructed networks (in columns), and for different density thresholds (x-axis). \*  $p < 0.05$  (Bonferroni corrected). +  $p < 0.1$  (marginally significant after correction). Abbreviations: global, global network; FPCN, fronto-parietal task control network; DMN, default mode network; HSMN, hand somatosensory-motor network; VN, visual network.
